# Supplementary material for: A Drosophila model to study retinitis pigmentosa pathology associated with mutations in the core splicing factor Prp8
Source: PubMed Central journal article supplement (PMC7328144; doi:10.1242/dmm.043174), 2020-06-26
Supplement: dmm-13-043174-s1.pdf [file dmm-13-043174-s1.pdf]

## A *Drosophila* model to study retinitis pigmentosa pathology associated with mutations in the core splicing factor Prp8

Dimitrije Stanković<sup>1</sup>, Ann-Katrin Claudius<sup>1</sup>, Thomas Schertel<sup>1</sup>, Tina Bresser<sup>1</sup>, Mirka Uhlirova<sup>1,2\*</sup>

Figure S1

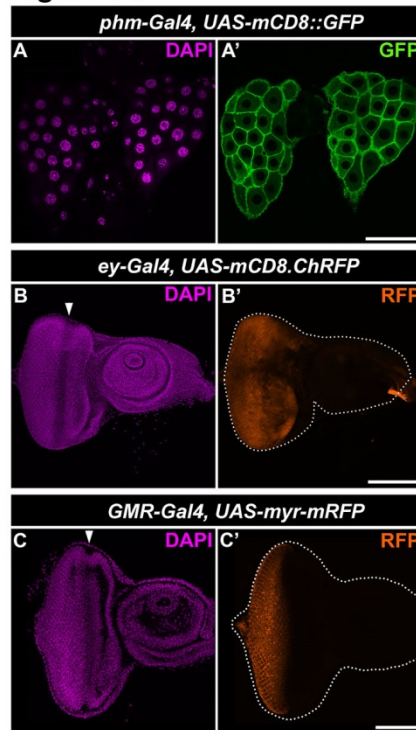

**Fig. S1. Expression patterns of Gal4 drivers used in the study.**

(A) *phm-Gal4* driver is active in the *Drosophila* prothoracic gland as depicted by GFP expressed from the UAS-based transgene. (B) *ey-Gal4* is active in the eye primordium of the larval EAD in cells both anterior and posterior to the morphogenetic furrow (arrowhead) as depicted by RFP expression. (C) The late acting *GMR-Gal4* driver expresses in cells posterior to the morphogenetic furrow (arrowhead) of larval EAD as indicated by the RFP signal. (A-C) Micrographs show projections of multiple confocal sections of respective tissues dissected from third instar larvae 7 days AEL. Scale bars: 50  $\mu\text{m}$  (A) and 100  $\mu\text{m}$  (B, C).

**Figure S2**

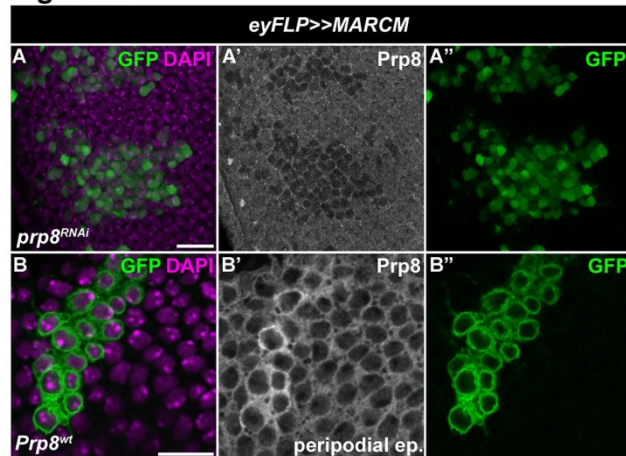

**Fig. S2. Prp8 antibody detects endogenous as well as transgenic *Drosophila* Prp8 proteins.** (A-B) *eyFLP*-mediated mitotic recombination was used to generate clones (GFP) in EADs of the indicated genotypes. Immunostaining of EADs with the self-made antibody directed against the CTD of the *Drosophila* Prp8 protein revealed reduction of Prp8 levels in clones where *prp8* transcript was knocked down by RNAi relative to non-clonal tissue (A'). In contrast, Prp8 levels were increased in cells overexpressing Prp8<sup>wt</sup> (B'). Note the cytoplasmic localization of the endogenous and transgenic Prp8 proteins (B'). Discs were counterstained with DAPI. Micrographs are single confocal slices of EADs 7 days after egg laying. Scale bars: 10  $\mu$ m.

Figure S3

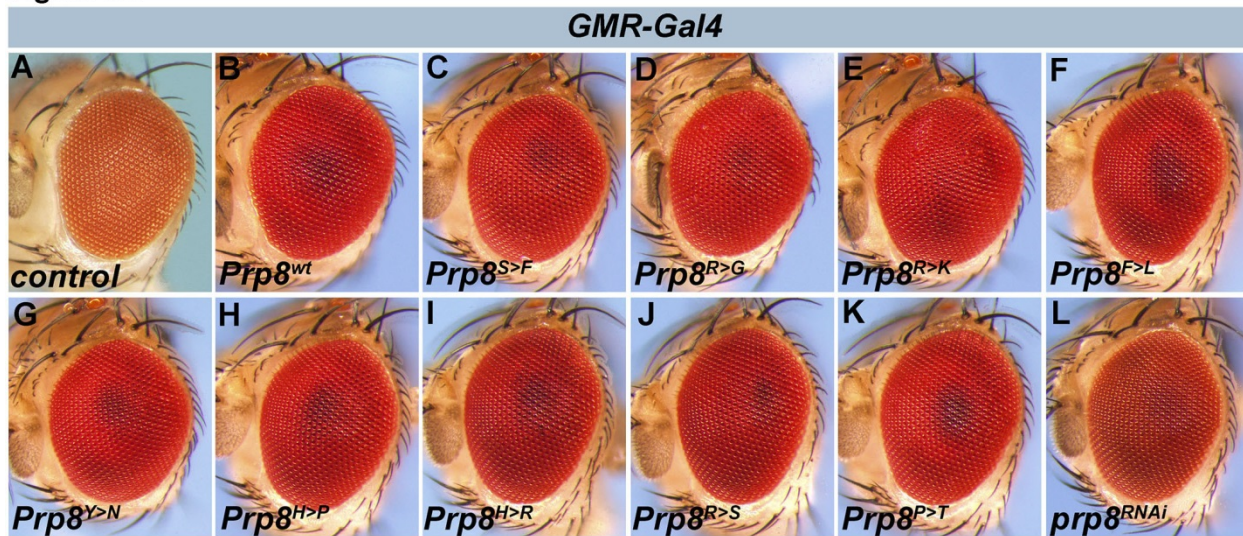

**Fig. S3. Expression of RP-Prp8 variants under the *GMR-Gal4* driver is asymptomatic.**

(A-L) Overexpression of wild-type Prp8 (B) or any of the nine different RP-Prp8 mutant variants (C-K) or RNAi-mediated knockdown (*prp8<sup>RNAi</sup>*) (L) using the late-acting *GMR-Gal4* driver did not have any detrimental effect on the development of the adult eye and were comparable to control (A).

Figure S4

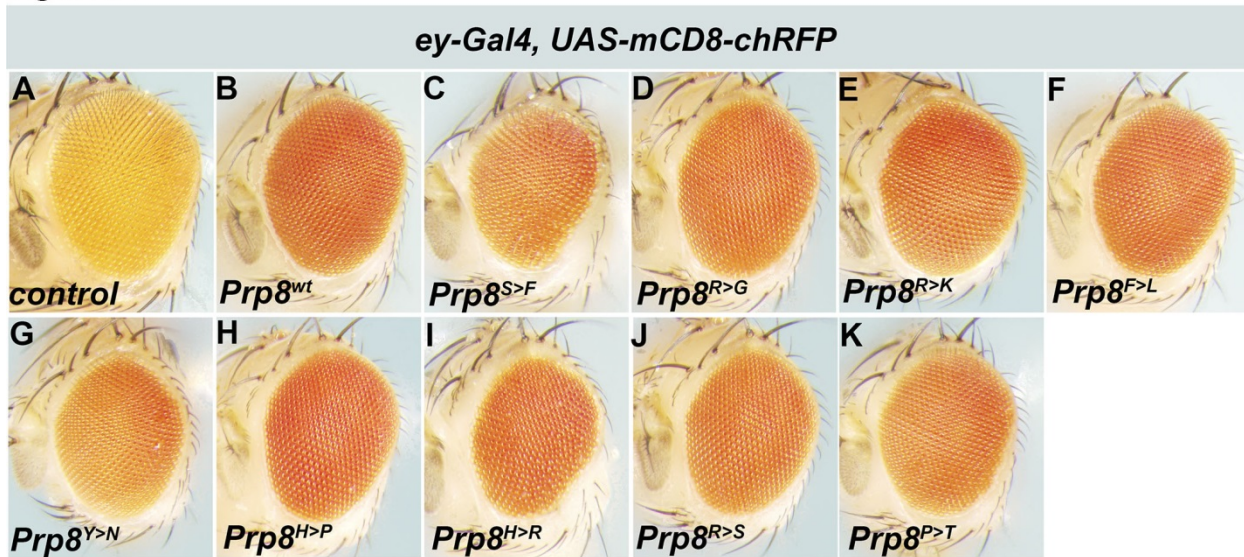

Fig. S4. Differential impact of early induction of RP-Prp8 mutations on the adult eye development.

(A-K) Expression of Prp8<sup>S>F</sup> (C) and Prp8<sup>H>R</sup> (I) in the EADs using the early acting *ey-Gal4* driver resulted in rough and irregularly shaped adult eyes compared to control (A) and those expressing Prp8<sup>wt</sup> (B) or other RP-Prp8 variants (D-H, J, K).

Figure S5

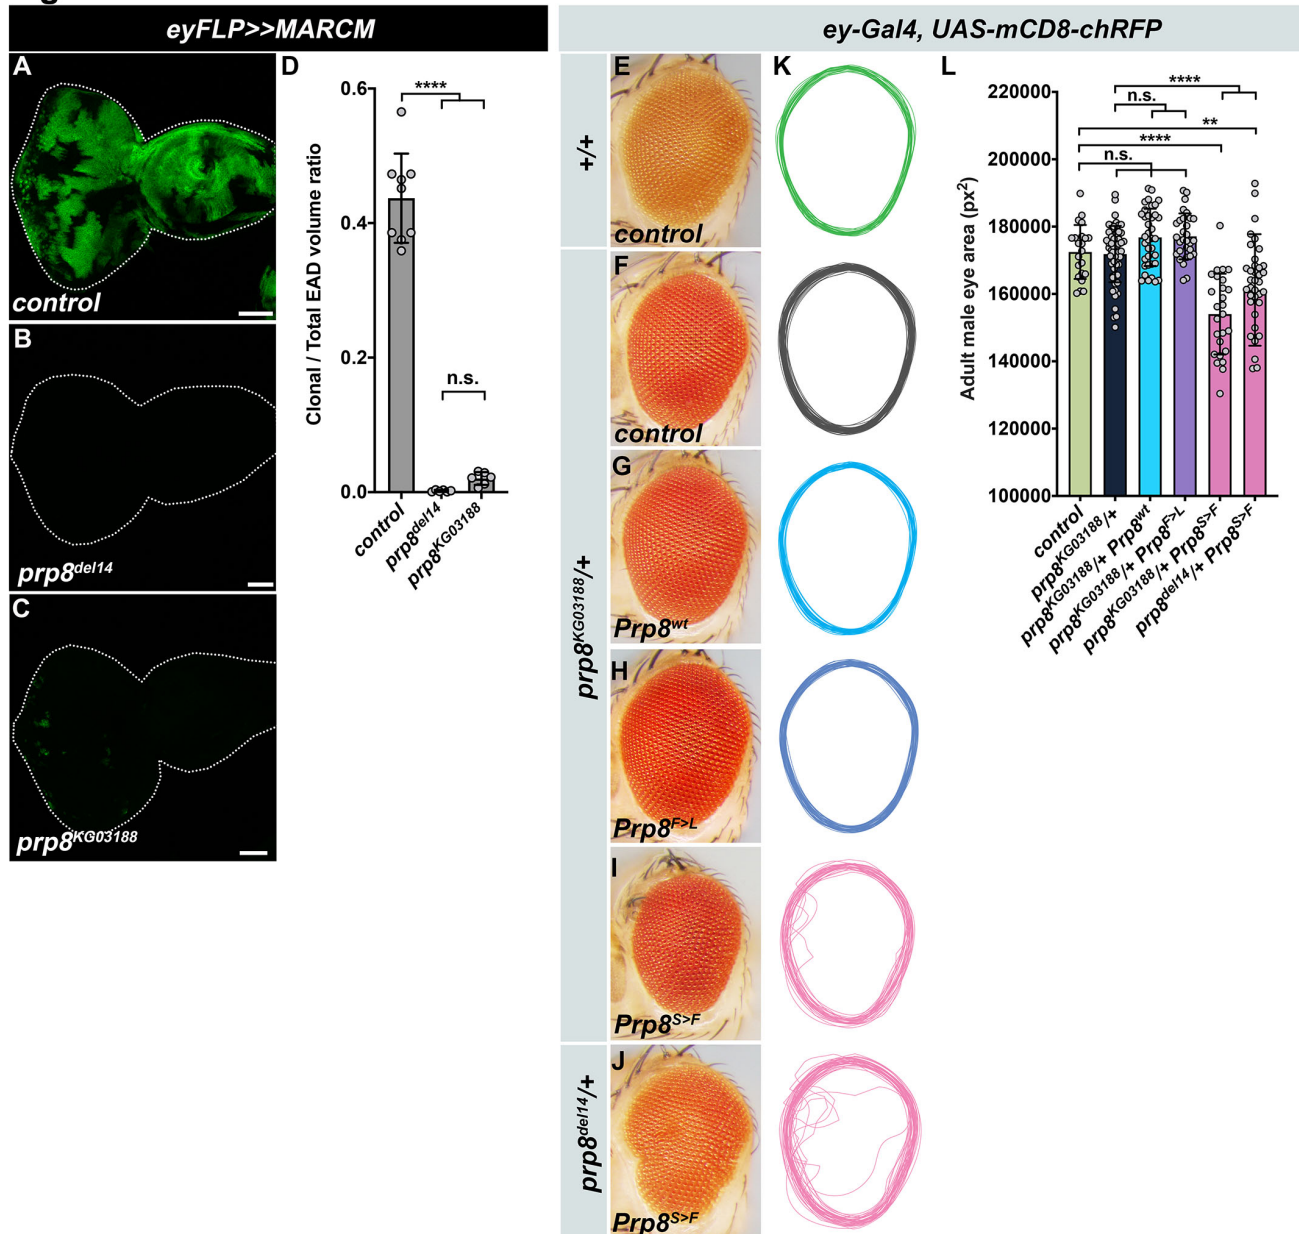

**Fig. S5. Prp8 loss is incompatible with cell survival and halving the *prp8* gene dose enhances RP-Prp8-induced phenotypes.**

(A-D) eyFLP-mediated mitotic recombination was used to generate homozygous clones (GFP) in EADs of the indicated genotypes. In contrast to control (A), cells homozygous for the *prp8<sup>del14</sup>* deletion allele (B) or the *prp8<sup>KG03188</sup>* insertion allele (C) do not survive and do not contribute to the total volume of the EAD tissue (D). (E-L) RP-Prp8 mutant variants were expressed in *prp8<sup>KG03188</sup>/+* heterozygous

background using the *ey-Gal4* driver. In contrast to controls ( $w^{1118} +/+$ , E;  $prp8^{KG03188}/+$ , F) and asymptomatic overexpression of  $Prp8^{wt}$  (G) and  $Prp8^{F>L}$  (H),  $Prp8^{S>F}$  disrupts morphology and reduces size of the adult eyes (I, L) mimicking phenotypes observed when overexpressed in  $prp8^{del14}/+$  heterozygotes (J, L). (D, L) Data represent means  $\pm$  s.d.,  $n=6-9$  (D),  $n=22-59$  (L). Statistical significance was determined using ordinary one-way ANOVA with Tukey's multiple comparisons test; \*\* $P<0.01$ , \*\*\*\* $P<0.0001$ , n.s. = non-significant. The exact number of biological replicates per genotype ( $n$ ) and  $P$ -values are specified in Supplementary Dataset 2.

Figure S6

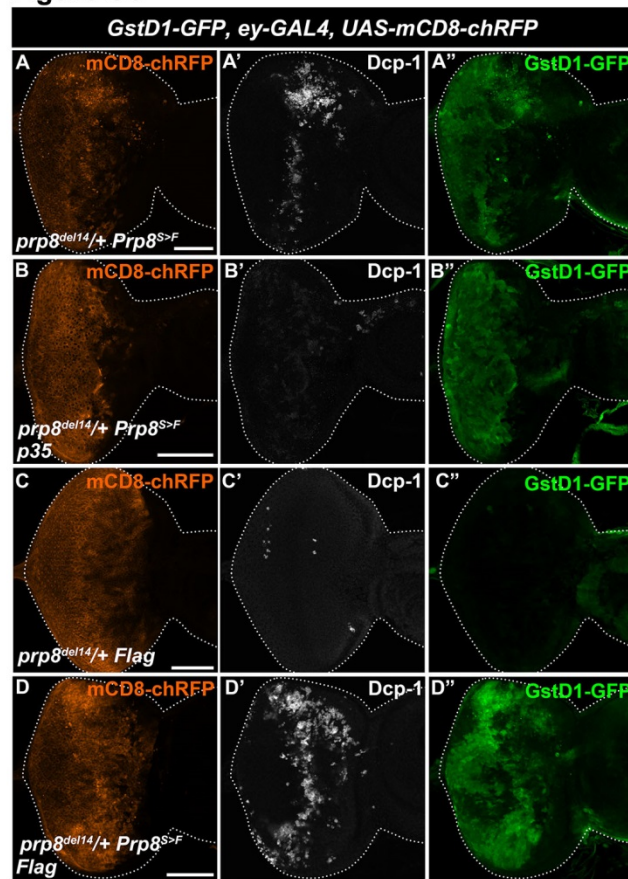

**Fig. S6. Blocking apoptosis does not suppress Prp8<sup>S>F</sup>-mediated GstD1 induction.**

(A-D) Eye-specific expression of Prp8<sup>S>F</sup> in the *prp8<sup>del14</sup>/+* heterozygous background using the *ey-Gal4* driver induces apoptosis (A') and activity of the *GstD1-GFP* reporter (A''). While co-expression of p35 effectively suppresses Prp8<sup>S>F</sup>-induced apoptosis (B') it does not block upregulation of the *GstD1-GFP* reporter (B''). Expression of the mock Flag tripeptide alone does not induce cell death or the *GstD1-GFP* reporter (C). Flag co-expression does not remedy the phenotypic consequences of Prp8<sup>S>F</sup> (D).

Table S1. List of *Drosophila* lines.

| Name                           | Genotype                                                                                                | Source                              | Identifier      |
|--------------------------------|---------------------------------------------------------------------------------------------------------|-------------------------------------|-----------------|
| ey>                            | $w^+$ ; $P\{w^{+m^*}=GAL4-ey.H\}3-8$                                                                    | Bloomington Drosophila Stock Center | RRID:BDSC_5534  |
| UAS-mCD8.ChRFP                 | $w^+$ ; $P\{w^{+m^*}=UAS-mCD8.ChRFP\}2$                                                                 | Bloomington Drosophila Stock Center | RRID:BDSC_27391 |
| ey>mCD8.ChRFP                  | $w$ ; $P\{w^{+m^*}=GAL4-ey.H\}3-8$ , UAS-mCD8.ChRFP/ CyO                                                | this study                          | N/A             |
| GstD1-GFP, ey>mCD8.ChRFP       | $w$ ; $P\{w^{+m^*}=GAL4-ey.H\}3-8$ , UAS-mCD8.ChRFP, GstD1-GFP/ CyO                                     | this study                          | N/A             |
| GstD1-GFP                      | $w$ ; GstD1-GFP/ CyO                                                                                    | Sykotis and Bohmann (2008)          | N/A             |
| GstD1-GFP, ey>mCD8.ChRFP, p35  | $w$ ; $P\{w^{+m^*}=GAL4-ey.H\}3-8$ , UAS-mCD8.ChRFP, UAS-p35, GstD1-GFP/ CyO                            | this study                          | N/A             |
| GstD1-GFP, ey>mCD8.ChRFP, Flag | $w$ ; $P\{w^{+m^*}=GAL4-ey.H\}3-8$ , UAS-mCD8.ChRFP, pTFW, GstD1-GFP/ CyO                               | this study                          | N/A             |
| dpp>                           | $y^1 w^{67c23}$ ; $P\{w^{+m^C}=dpp-GAL4.PS\}6A/TM3, Ser^1$                                              | Bloomington Drosophila Stock Center | RRID:BDSC_7007  |
| dpp>mCD8.ChRFP                 | $w$ ; ey-Gal4, UAS-mCD8.ChRFP/ CyO                                                                      | this study                          | N/A             |
| phm>                           | $y^1 w[*]$ ; $P\{w^{+m^C}=phm-GAL4.O\}22$                                                               | Ono et al. (2006)                   | RRID:BDSC_80577 |
| phm>mCD8::GFP                  | $w$ ; phm-GAL4, UAS-mCD8::GFP.L/ TM6B                                                                   | Ono et al. (2006)                   | N/A             |
| GMR>                           | $w^+$ ; $P\{w^{+m^C}=GAL4-ninaE.GMR\}12$                                                                | Bloomington Drosophila Stock Center | RRID:BDSC_1104  |
| UAS-myr-mRFP                   | $w^{1118}$ ; $P\{w^{+m^C}=UAS-myr-mRFP\}1$                                                              | Bloomington Drosophila Stock Center | RRID:BDSC_7118  |
| GMR>myr-mRFP                   | $w$ ; GMR-Gal4, UAS-myr-mRFP/ CyO                                                                       | this study                          | N/A             |
| ey MARCM>>FRT82B Green         | eyFLP; act>y>Gal4, UAS-GFP; $P\{ry^{+t7.2}=neoFRT\}82B tub-Gal80$                                       | Pagliarini and Xu (2003)            | N/A             |
| ey MARCM>>FRT42D Green         | eyFLP; $P\{ry^{+t7.2}=neoFRT\}42D tub-Gal80/ T(2;3)B3$ , CyO:TM6 Tb <sup>1</sup> / act>y+>Gal4, UAS-GFP | this study                          | N/A             |
| FRT42D                         | $P\{ry^{+t7.2}=neoFRT\}42D$ ; $ry^{605}$                                                                | Bloomington Drosophila Stock Center | RRID:BDSC_1802  |



|                                    |                                                                                                                                    |                                           |                 |
|------------------------------------|------------------------------------------------------------------------------------------------------------------------------------|-------------------------------------------|-----------------|
| <b>FRT82B</b>                      | <i>P{ry<sup>+t7.2=neoFRT</sup>82B ry<sup>605</sup></i>                                                                             | Bloomington<br>Drosophila Stock<br>Center | RRID:BDSC_2035  |
| <b>Act5C-cas9, Lig4[169]</b>       | <i>y<sup>1</sup>, M(Act5C-Cas9)ZH-2A, w<sup>1118</sup>,<br/>Lig4<sup>169</sup></i>                                                 | Zhang et al. (2014)                       | RRID:BDSC_54590 |
| <b>sgRNA-Prp8</b>                  | <i>v<sup>1</sup>; pCFD4-U6:1-U6:3 sgRNA-Prp8/<br/>TM6b</i>                                                                         | this study                                | N/A             |
| <b>nos-phiC31int;;attP2</b>        | <i>y<sup>1</sup> sc<sup>1</sup> v<sup>1</sup> P{y<sup>+t7.7=nos-<br/>phiC31\int.NLS</sup>X;<br/>P{y<sup>+t7.7=CaryP</sup>attP2</i> | Bloomington<br>Drosophila Stock<br>Center | RRID:BDSC_25710 |
| <b>Prp8<sup>wt</sup></b>           | <i>w;; pUAST-attB-Prp8<sup>wt</sup> attP-9A /<br/>TM6B</i>                                                                         | this study                                | N/A             |
| <b>Prp8<sup>H&gt;R</sup></b>       | <i>w;; pUAST-attB-prp8<sup>H2369R</sup> attP-9A/<br/>TM6B</i>                                                                      | this study                                | N/A             |
| <b>Prp8<sup>H&gt;P</sup></b>       | <i>w;; pUAST-attB-prp8<sup>H2369P</sup> attP-9A /<br/>TM6B</i>                                                                     | this study                                | N/A             |
| <b>Prp8<sup>Y&gt;N</sup></b>       | <i>w;; pUAST-attB-prp8<sup>Y2395N</sup> attP-9A /<br/>TM6B</i>                                                                     | this study                                | N/A             |
| <b>Prp8<sup>F&gt;L</sup></b>       | <i>w;; pUAST-attB-prp8<sup>F2374L</sup> attP-9A /<br/>TM6B</i>                                                                     | this study                                | N/A             |
| <b>Prp8<sup>R&gt;G</sup></b>       | <i>w;; pUAST-attB-prp8<sup>R2370G</sup> attP-9A /<br/>TM6B</i>                                                                     | this study                                | N/A             |
| <b>Prp8<sup>S&gt;F</sup></b>       | <i>w;; pUAST-attB-prp8<sup>S2178F</sup> attP-9A /<br/>TM6B</i>                                                                     | this study                                | N/A             |
| <b>Prp8<sup>R&gt;K</sup></b>       | <i>w;; pUAST-attB-prp8<sup>R2370K</sup> attP-9A /<br/>TM6B</i>                                                                     | this study                                | N/A             |
| <b>Prp8<sup>R&gt;S</sup></b>       | <i>w;; pUAST-attB-prp8<sup>R2370S</sup> / TM6B</i>                                                                                 | this study                                | N/A             |
| <b>Prp8<sup>P&gt;T</sup></b>       | <i>w;; pUAST-attB-prp8<sup>P2361T</sup> attP-9A /<br/>TM6B</i>                                                                     | this study                                | N/A             |
| <b>Flag::Prp8<sup>wt</sup></b>     | <i>w;; pUAST-attB-Flag::Prp8<sup>wt</sup> attP2/<br/>TM6B</i>                                                                      | this study                                | N/A             |
| <b>Flag::Prp8<sup>H&gt;R</sup></b> | <i>w;; pUAST-attB-Flag::Prp8<sup>H2369R</sup><br/>attP2/ TM6B</i>                                                                  | this study                                | N/A             |
| <b>Flag::Prp8<sup>H&gt;P</sup></b> | <i>w;; pUAST-attB-Flag::Prp8<sup>H2369P</sup><br/>attP2/ TM3</i>                                                                   | this study                                | N/A             |
| <b>Flag::Prp8<sup>F&gt;L</sup></b> | <i>w;; pUAST-attB-Flag::Prp8<sup>F2374L</sup><br/>attP2/ TM6B</i>                                                                  | this study                                | N/A             |
| <b>Flag::Prp8<sup>R&gt;K</sup></b> | <i>w;; pUAST-attB-Flag::Prp8<sup>R2370K</sup><br/>attP2/ TM6B</i>                                                                  | this study                                | N/A             |
| <b>Flag::Prp8<sup>P&gt;T</sup></b> | <i>w;; pUAST-attB-Flag::Prp8<sup>P2361T</sup><br/>attP2/ TM6B</i>                                                                  | this study                                | N/A             |
| <b>Flag::Prp8<sup>S&gt;F</sup></b> | <i>w;; pUAST-attB-Flag::Prp8<sup>S2178F</sup><br/>attP2/ TM6B</i>                                                                  | this study                                | N/A             |
| <b>Flag::Prp8<sup>R&gt;S</sup></b> | <i>w;; pUAST-attB-Flag::Prp8<sup>R2370S</sup><br/>attP2/ TM6B</i>                                                                  | this study                                | N/A             |
| <b>Flag</b>                        | <i>w; pTFW</i>                                                                                                                     | this study                                | N/A             |

|                                                              |                                                                                                                                                                                               |                                     |                 |
|--------------------------------------------------------------|-----------------------------------------------------------------------------------------------------------------------------------------------------------------------------------------------|-------------------------------------|-----------------|
| <b>FRT42D, prp8<sup>del14</sup></b>                          | <i>w; P{ry<sup>+t7.2</sup>=neoFRT}42D, prp8<sup>del14</sup>/CyO, P{ActGFP}JMR1</i>                                                                                                            | this study                          | N/A             |
| <b>FRT42D, prp8<sup>del14</sup>; Prp8<sup>S&gt;F</sup></b>   | <i>w; P{ry<sup>+t7.2</sup>=neoFRT}42D, prp8<sup>del14</sup>/T(2;3)B3, CyO:TM6 Tb<sup>1</sup>/pUAST-attB-Prp8<sup>S2178F</sup> attP-9A</i>                                                     | this study                          | N/A             |
| <b>FRT42D, prp8<sup>del14</sup>; Prp8<sup>wt</sup></b>       | <i>w; P{ry<sup>+t7.2</sup>=neoFRT}42D, prp8<sup>del14</sup>/T(2;3)B3, CyO:TM6 Tb<sup>1</sup>/pUAST-attB-Prp8<sup>wt</sup> attP-9A</i>                                                         | this study                          | N/A             |
| <b>FRT42D, prp8<sup>del14</sup>; Prp8<sup>F&gt;L</sup></b>   | <i>w; P{ry<sup>+t7.2</sup>=neoFRT}42D, prp8<sup>del14</sup>/T(2;3)B3, CyO:TM6 Tb<sup>1</sup>/pUAST-attB-Prp8<sup>F2374L</sup> attP-9A</i>                                                     | this study                          | N/A             |
| <b>FRT42D, prp8<sup>del14</sup>; Prp8<sup>H&gt;R</sup></b>   | <i>w; P{ry<sup>+t7.2</sup>=neoFRT}42D, prp8<sup>del14</sup>/T(2;3)B3, CyO:TM6 Tb<sup>1</sup>/pUAST-attB-Prp8<sup>H2369R</sup> attP-9A</i>                                                     | this study                          | N/A             |
| <b>prp8<sup>RNAi</sup></b>                                   | <i>w; UAS-prp8<sup>RNAi</sup> [GD18565]</i>                                                                                                                                                   | Vienna Drosophila Resource Center   | N/A             |
| <b>prp8<sup>RNAi</sup>, FRT82B</b>                           | <i>w; UAS-prp8<sup>RNAi</sup> [GD18565]; P{ry<sup>+t7.2</sup>=neoFRT}82B</i>                                                                                                                  | this study                          | N/A             |
| <b>FRT42D; Prp8<sup>wt</sup></b>                             | <i>w; P{ry<sup>+t7.2</sup>=neoFRT}42D; pUAST-attB-Prp8<sup>wt</sup> attP-9A/ TM6B</i>                                                                                                         | this study                          | N/A             |
| <b>p35</b>                                                   | <i>w; UAS-p35</i>                                                                                                                                                                             | Bloomington Drosophila Stock Center | RRID: BDSC_5072 |
| <b>FRT42D prp8<sup>KG03188</sup></b>                         | <i>w; P{ry<sup>+t7.2</sup>=neoFRT}42D P{y<sup>+mDint2</sup> w<sup>BR.E.BR</sup>=SUPor-P}Prp8<sup>KG03188</sup>/ CyO, y<sup>+</sup></i>                                                        | Kyoto stock Center 111506           |                 |
| <b>prp8<sup>KG03188</sup></b>                                | <i>P{SUPor-P}Prp8 Prp8<sup>KG03188</sup>/ CyO, P{ActGFP}JMR1</i>                                                                                                                              | Bloomington Drosophila Stock Center | RRID:BDSC_13006 |
| <b>FRT42D prp8<sup>KG03188</sup>; Prp8<sup>F&gt;L</sup></b>  | <i>w; P{ry<sup>+t7.2</sup>=neoFRT}42D P{y<sup>+mDint2</sup> w<sup>BR.E.BR</sup>=SUPor-P}Prp8<sup>KG03188</sup>/ T(2;3)B3, CyO:TM6 Tb<sup>1</sup>/pUAST-attB-Prp8<sup>F2374L</sup> attP-9A</i> | Kyoto stock Center 111506           |                 |
| <b>FRT42D prp8<sup>KG03188</sup>; Prp8<sup>wt</sup></b>      | <i>w; P{ry<sup>+t7.2</sup>=neoFRT}42D P{y<sup>+mDint2</sup> w<sup>BR.E.BR</sup>=SUPor-P}Prp8<sup>KG03188</sup>/ T(2;3)B3, CyO:TM6 Tb<sup>1</sup>/pUAST-attB-Prp8<sup>wt</sup> attP-9A</i>     | Bloomington Drosophila Stock Center | RRID:BDSC_13006 |
| <b>FRT42D, prp8<sup>KG03188</sup>; Prp8<sup>S&gt;F</sup></b> | <i>w; P{ry<sup>+t7.2</sup>=neoFRT}42D, prp8<sup>del14</sup>/T(2;3)B3, CyO:TM6 Tb<sup>1</sup>/pUAST-attB-Prp8<sup>S2178F</sup> attP-9A</i>                                                     | this study                          | N/A             |

**Table S2. List of vectors and plasmids.**

| Name                          | Source                              | Catalog Number | Identifier |
|-------------------------------|-------------------------------------|----------------|------------|
| pDest17                       | Thermo Scientific                   | Cat. #11803012 | N/A        |
| pDest17 Prp8-CTD              | this study                          |                | N/A        |
| pCFD4-U6:1_U6:3tandemgRNAs    | Port et al. (2014), Addgene         | Cat. #49411    | N/A        |
| CFD4-U6:1-U6:3 Prp8 sgRNA     | this study                          |                | N/A        |
| pAW-GAL4                      | Y. Hiromi                           |                | N/A        |
| pIE-EGFP                      |                                     |                | N/A        |
| pUAST-attB                    | Drosophila Genomics Resource Center | Cat. #1419     | N/A        |
| pENTR4 dual selection         | Thermo Scientific                   | Cat. #A10465   | N/A        |
| pTFW                          | Drosophila Genomics Resource Center | Cat. #1115     | N/A        |
| pUAST-attB-Prp8[H2369R]       | this study                          |                | N/A        |
| pUAST-attB-Prp8[H2369P]       | this study                          |                | N/A        |
| pUAST-attB-Prp8[Y2395N]       | this study                          |                | N/A        |
| pUAST-attB-Prp8[F2374L]       | this study                          |                | N/A        |
| pUAST-attB-Prp8[H2370G]       | this study                          |                | N/A        |
| pUAST-attB-Prp8[wt]           | this study                          |                | N/A        |
| pUAST-attB-Prp8[S2178F]       | this study                          |                | N/A        |
| pUAST-attB-Prp8[R2370K]       | this study                          |                | N/A        |
| pUAST-attB-Prp8[R2370S]       | this study                          |                | N/A        |
| pUAST-attB-Prp8[P2361T]       | this study                          |                | N/A        |
| pUAST-attB-Flag::Prp8[H2369R] | this study                          |                | N/A        |
| pUAST-attB-Flag::Prp8[H2369P] | this study                          |                | N/A        |
| pUAST-attB Flag::Prp8[wt]     | this study                          |                | N/A        |
| pUAST-attB-Flag::Prp8[R2370K] | this study                          |                | N/A        |
| pUAST-attB-Flag::Prp8[P2361T] | this study                          |                | N/A        |
| pUAST-attB-Flag::Prp8[S2178F] | this study                          |                | N/A        |
| pUAST-attB-Flag::Prp8[R2370S] | this study                          |                | N/A        |
| pUAST-attB-Flag::Prp8[F2374L] | this study                          |                | N/A        |
| pENTR4-Prp8[R2370K]           | this study                          |                | N/A        |
| pENTR4-Prp8[R2370S]           | this study                          |                | N/A        |
| pENTR4-Prp8[H2369R]           | this study                          |                | N/A        |

|                            |                        |  |     |
|----------------------------|------------------------|--|-----|
| <b>pENTR4-Prp8[S2178F]</b> | this study             |  | N/A |
| <b>pENTR4-Prp8[F2374L]</b> | this study             |  | N/A |
| <b>pENTR4-Prp8[Y2395N]</b> | this study             |  | N/A |
| <b>pENTR4-Prp8[H2370G]</b> | this study             |  | N/A |
| <b>pENTR-Prp8[H2369P]</b>  | this study             |  | N/A |
| <b>pENTR4-Prp8[P2361T]</b> | this study             |  | N/A |
| <b>pENTR4-Prp8[wt]</b>     | this study             |  | N/A |
| <b>PTFW-Prp8[wt]</b>       | Claudius et al. (2014) |  | N/A |

**Table S3. List of oligonucleotides.**

| Name                            | Sequence                                                                  | Purpose     |
|---------------------------------|---------------------------------------------------------------------------|-------------|
| sgRNA_pCFD4_Prpr8_Intron_12_For | TATATAGGAAAGATATCCGGGTGAACTTCGTACTAGTACATATGCTAAGTGTTTTAGAGCTAGAAATAGCAAG | cloning     |
| sgRNA_pCFD4_Prpr8_3'UTR_1_Rev   | ATTTTAACTTGCTATTTCTAGCTCTAAAATAAGACTCCATATGCGCACCGACGTTAAATTGAAAATAGGTC   | cloning     |
| Spok iQ For                     | GCTCTTTGGCGGTGATCGAAACAA                                                  | qPCR        |
| Spok iQ Rev                     | CGCCGAGCTAAATTTCTCCGCTTT                                                  | qPCR        |
| Spok iQ For intron              | CGAGAATTTGGTTGCCAGCGAAACA                                                 | qPCR        |
| Spok iQ Rev intron              | GCCATCCTCTTAAGGAGTGTGGTCAT                                                | qPCR        |
| RpL49 For                       | TCCTACCAGCTTCAAGATGAC                                                     | qPCR        |
| RpL49 Rev                       | CACGTTGTGCACCAGGAACT                                                      | qPCR        |
| Prp8_H2369R_For                 | ATCACGAGTTGCGTTCGCACCTCGCA                                                | mutagenesis |
| Prp8_H2369R_Rev                 | TGCGAGGTGCGACGCAACTCGTGAT                                                 | mutagenesis |
| Prp8_H2309P_For                 | ATCACGAGTTGCCTCGCACCTC                                                    | mutagenesis |
| Prp8_H2309P_Rev                 | GAGGTGCGAGGCAACTCGTGAT                                                    | mutagenesis |
| Prp8_Y2334N_for                 | CGGGAGGATGTGAACGCGTAAGCGC                                                 | mutagenesis |
| Prp8_Y2334N_rev                 | GCGCTTACGCTTCACATCCTCCCG                                                  | mutagenesis |
| Prp8_F2374L_For                 | ACCTCGCATTTACTGCTCTTCTCG                                                  | mutagenesis |
| Prp8_F2374L_Rev                 | CGAGAAGAGCAGTAAATGCGAGGT                                                  | mutagenesis |
| Prp8_R2310G_For                 | CACGAGTTGCATGGCACCTCGCATT                                                 | mutagenesis |
| Prp8_R2310G_Rev                 | AATGCGAGGTGCCATGCAACTCGTG                                                 | mutagenesis |
| Prp8_S2118F_For                 | GTCACGATCTTTGATCTGCGGGCC                                                  | mutagenesis |
| Prp8_S2118F_Rev                 | GGCCCGCAGATCAAAGATCGTGAC                                                  | mutagenesis |
| Prp8_R2310K_For                 | ACGAGTTGCATAAGACCTCGCATTT                                                 | mutagenesis |
| Prp8_R2310K_Rev                 | AAATGCGAGGTCTTATGCAACTCGT                                                 | mutagenesis |
| Prp8_R2310S_For                 | ACGAGTTGCATTCCACCTCGCATTT                                                 | mutagenesis |
| Prp8_R2310S_Rev                 | AAATGCGAGGTGGAATGCAACTCGT                                                 | mutagenesis |
| Prp8_P2361T_For                 | AGCTGGCCAACACGAAGGAGTTCTA                                                 | mutagenesis |
| Prp8_P2361T_Rev                 | TAGAACTCCTTCGTGTTGGCCAGCT                                                 | mutagenesis |
| PRP8 cDNA Bcl1 Forward          | AAATGATCACGATGTCCATTCCGCCGTACATG                                          | cloning     |
| PRP8 cDNA Not1 Rev              | AAAGCGGCCGCGCTTACGCGTACACATCCTCCC                                         | cloning     |
| PRP8 CTD EcoRI For              | AAAGAATTCCCATGCAGACCAAGGAGCAAACCAAC                                       | cloning     |
| ets21c iQ For                   | ATTAATGCCATGCATCAGGATGTCCG                                                | qPCR        |
| ets21c iQ Rev                   | GTGGGAACTTCCGTCTCCTTCG                                                    | qPCR        |
| GstE6 iQ For                    | CCAAGGAGCGATACGATGCCA                                                     | qPCR        |
| GstE6 iQ Rev                    | CCACGAAGGCCTCAAGGGAG                                                      | qPCR        |

|                       |                          |      |
|-----------------------|--------------------------|------|
| <b>dilp8 iQ For</b>   | GCACAACAAGCATCACTACATCA  | qPCR |
| <b>dilp8 iQ Rev</b>   | GTTGTAGGACCTGCTCGAGTG    | qPCR |
| <b>arc1 iQ For</b>    | GCTGAACATCAAGTACCGCAAGCA | qPCR |
| <b>arc1 iQ Rev</b>    | GTGTTCTTTGCTGTGGCAAGCTGT | qPCR |
| <b>CG42260 iQ For</b> | TACTCAATATGGGCACCGC      | qPCR |
| <b>CG42260 iQ Rev</b> | CTTCAGCACGTCCCACATG      | qPCR |

### Supplementary Dataset 1

[Click here to download Supplementary Dataset 1](#)

### Supplementary Dataset 2

[Click here to download Supplementary Dataset 2](#)
